# Supplementary material for: Short-term transcriptomic response to plasma membrane injury
Source: PubMed Central journal article supplement (PMC8476590; doi:10.1038/s41598-021-98420-y), 2021-09-27
Supplement: 41598_2021_98420_MOESM1_ESM.pdf [file 41598_2021_98420_MOESM1_ESM.pdf]

## Supplementary Information

### Short-term transcriptomic response to plasma membrane injury

Swantje Christin Häger<sup>1,5</sup>, Catarina Dias<sup>1,5</sup>, Stine Lauritzen Sønder<sup>1</sup>, André Vidas Olsen<sup>2</sup>, Isabelle da Piedade<sup>2</sup>, Anne Sofie Busk Heitmann<sup>1</sup>, Elena Papaleo<sup>2,3</sup> & Jesper Nylandsted<sup>1,4,✉</sup>

<sup>1</sup>Membrane Integrity, Danish Cancer Society Research Center, Strandboulevarden 49, 2100 Copenhagen, Denmark. <sup>2</sup>Computational Biology Laboratory, Center for Autophagy, Recycling and Disease, Danish Cancer Society Research Center, Strandboulevarden 49, 2100 Copenhagen, Denmark. <sup>3</sup>Translational Disease Systems Biology, Faculty of Health and Medical Sciences, Novo Nordisk Foundation Center for Protein Research University of Copenhagen, Blegdamsvej 3B, 2200 Copenhagen N, Denmark. <sup>4</sup>Department of Cellular and Molecular Medicine, Faculty of Health Sciences, University of Copenhagen, Blegdamsvej 3C, 2200 Copenhagen N, Denmark. <sup>5</sup>These authors contributed equally: Swantje Christin Häger and Catarina Dias. ✉email: [jnl@cancer.dk](mailto:jnl@cancer.dk)

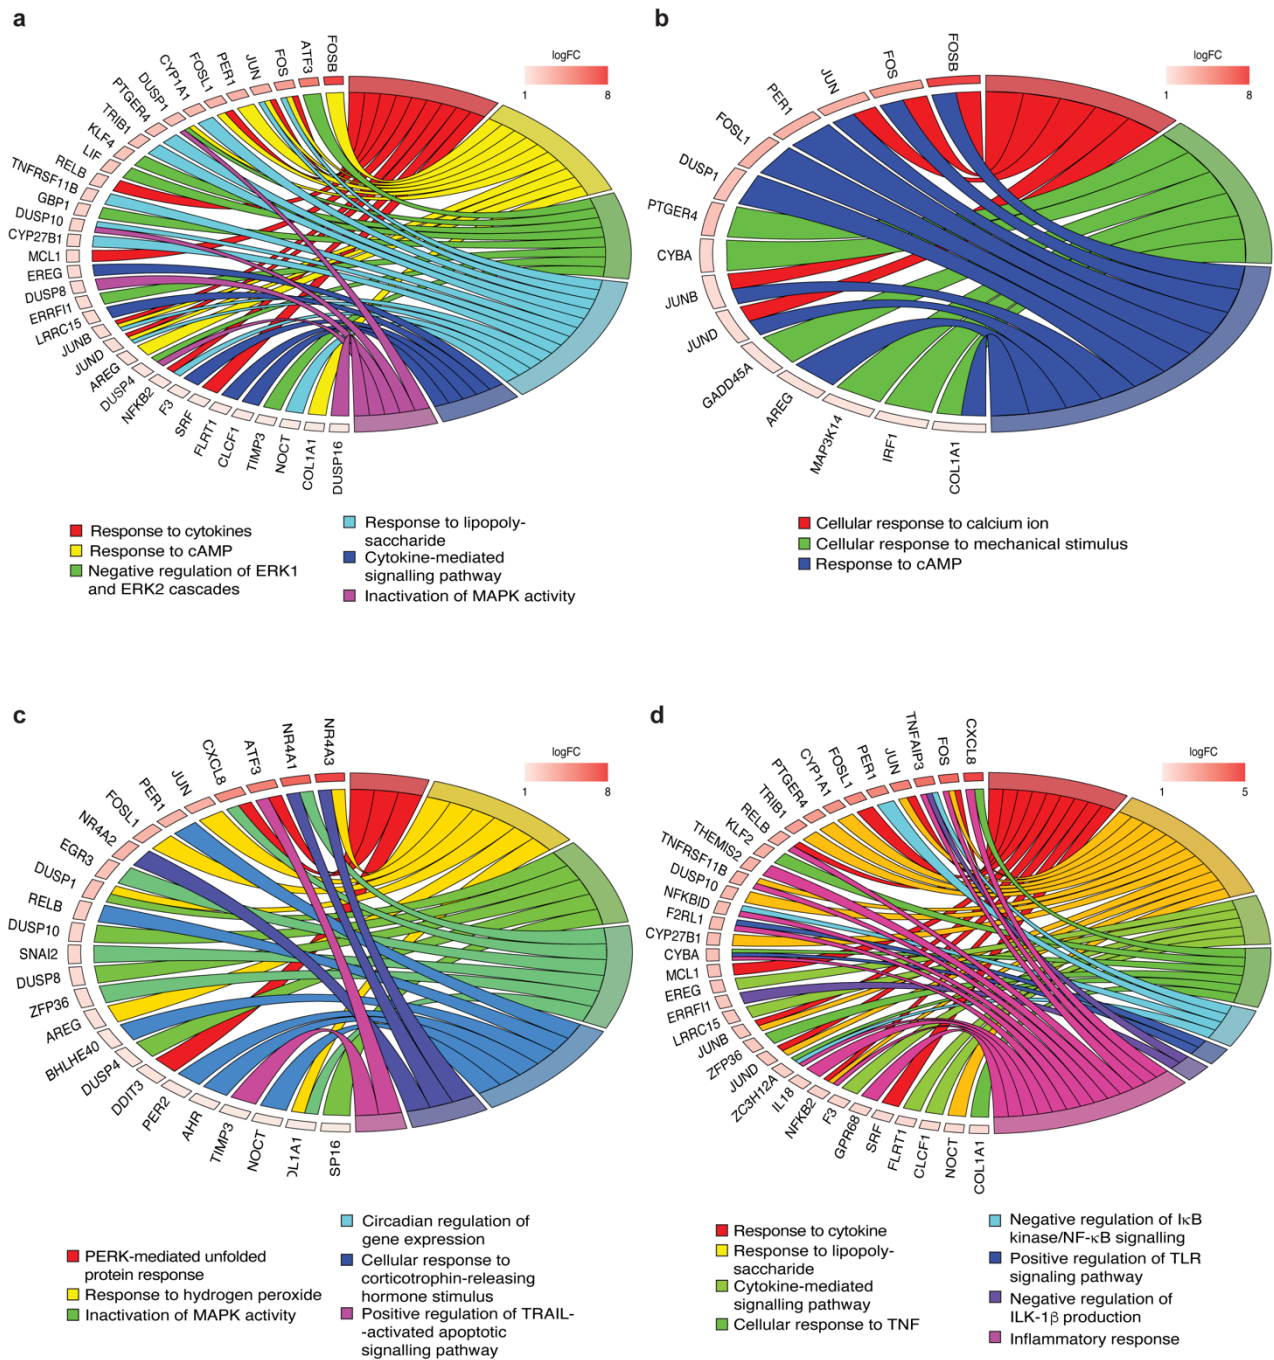

**Supplementary figure S1: GO terms related to the injury-induced transcriptional response**  
 Circular plots of the GO terms significantly associated to the RNA-seq data obtained 60 min post-injury, with the corresponding regulated genes and their log<sub>2</sub> fold change. The most enriched (a), Ca<sup>2+</sup>-regulated (b), stress-related (c) and inflammatory and immune-related (d) GO terms are represented.

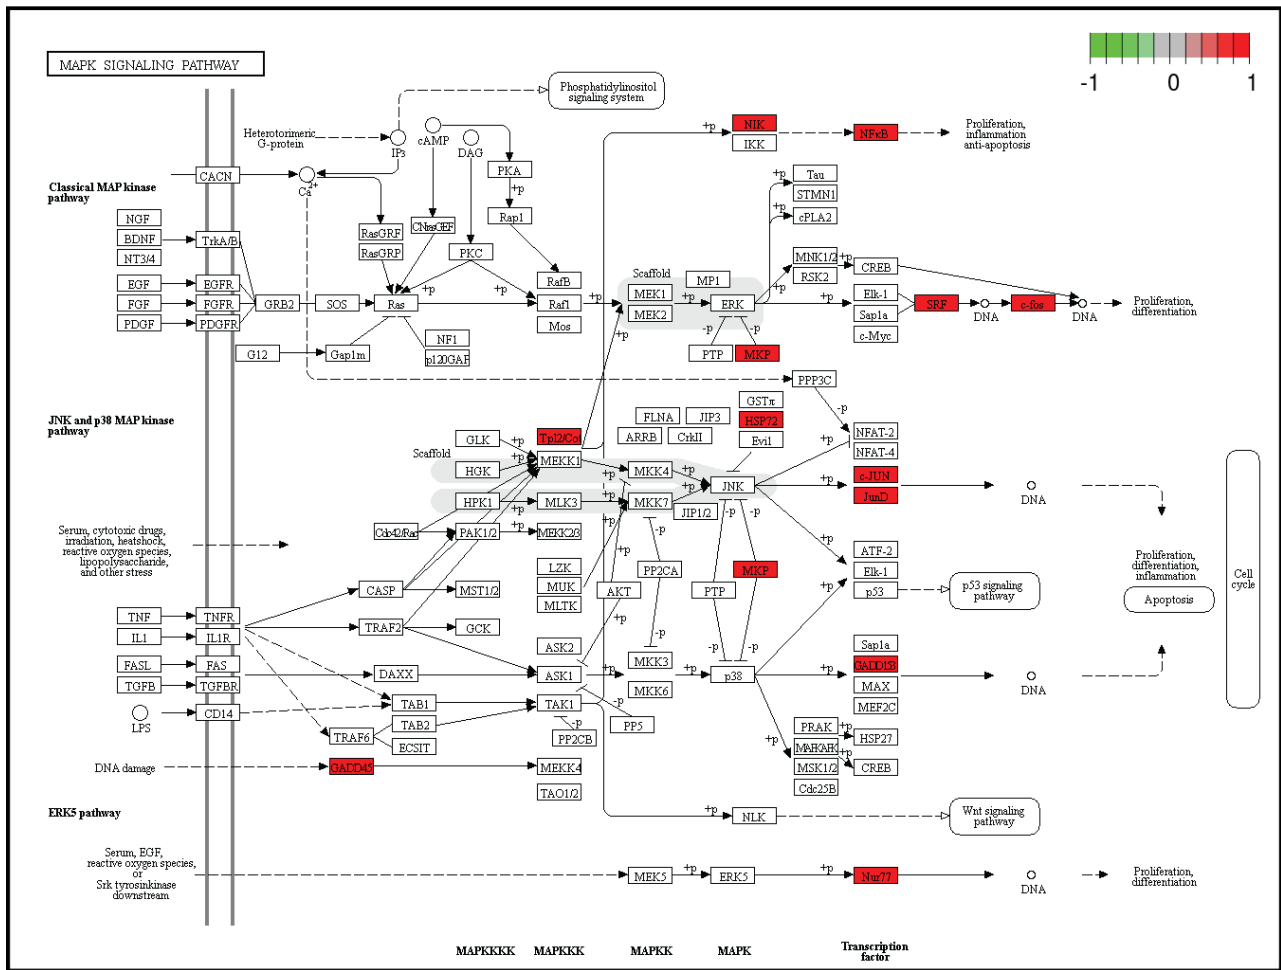

**Supplementary figure S2: Predicted regulation of the MAPK signalling cascade at 60 min post-injury in digitonin-injured MCF-7 breast cancer cells**

KEGG pathway<sup>37-39</sup> graph rendered by Pathview showing the different branches of the MAPK signalling cascade (the canonical ERK, p38 and JNK and the atypical ERK5) with colour-coded protein symbols to represent increased mRNA expression (in red) detected in the dataset. These are encoded by the following gene symbols: NIK (MAP3K14), NF-κB (NFKB), SRF (SRF), c-fos (FOS), MKP (DUSP1), Tpl2/Co1 (MAP3K8), HSP72 (HSPA6), c-JUN (JUN), JunD (JUND), GADD153 (DDIT3), GADD45 (GADD45A) and Nur77 (NR4A1).

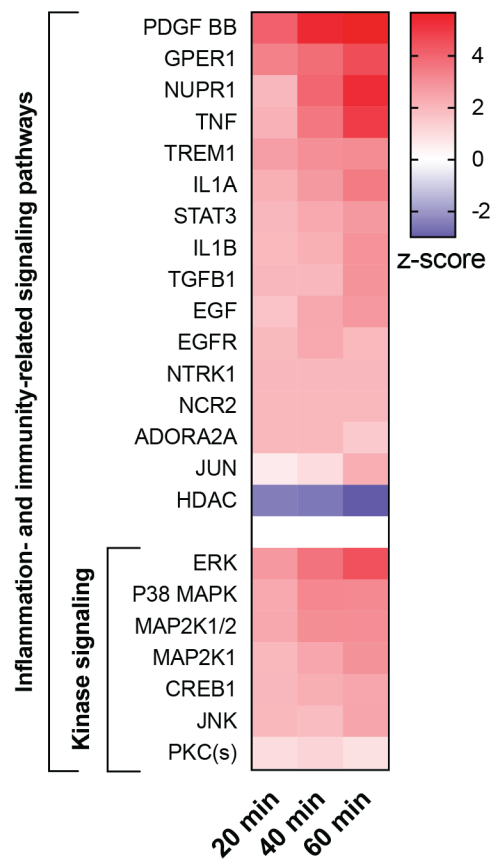

**Supplementary figure S3: Potential upstream regulators of the post-injury transcriptomic response**  
 Potential upstream transcriptional regulators responsible for the mRNA changes detected for all post-injury timepoints analysed (predicted by the Ingenuity Pathway Analysis). These upstream transcriptional regulators are significantly associated to the dataset ( $-\log(p\text{-value}) > 1.3$ ) and have a z-score that reflects their predicted activation state (a positive/negative z-score indicates activation/inhibition) – plotted in the heatmap.

a

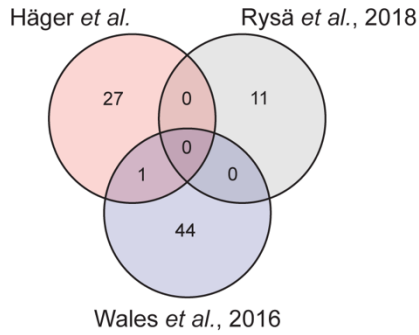

b

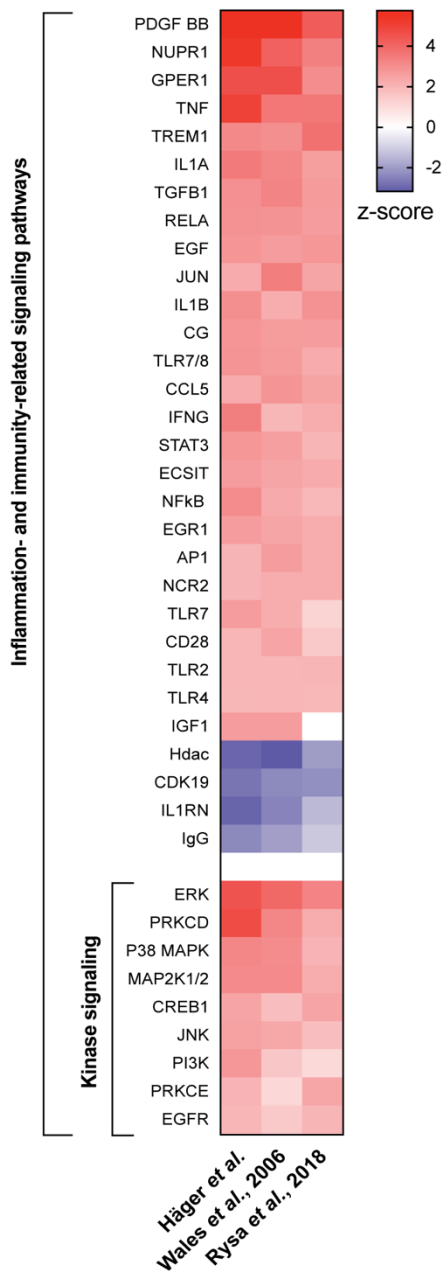

c

| Gene symbol                                  | Gene name                             | Häger et al. | Rysä et al., 2018 | Wales et al., 2016 |
|----------------------------------------------|---------------------------------------|--------------|-------------------|--------------------|
| CREBRF                                       | CREB3 regulatory factor               | 1.406        | -                 | -                  |
| CGA                                          | Glycoprotein hormones                 | 6.760        | -                 | 1.83               |
| <b>NF-kB inhibitor</b>                       |                                       |              |                   |                    |
| NFKBID                                       | NFKB inhibitor delta                  | 1.894        | -                 | 1.42               |
| NFKBIA                                       | NFKB inhibitor alpha                  | 1.632        | -                 | 1.58               |
| NFKBIZ                                       | NFKB inhibitor zeta                   | -            | 0.850             | 0.95               |
| <b>TGFB1-induced anti-apoptotic factor 1</b> |                                       |              |                   |                    |
| TIAF1                                        | TGFB1-induced anti-apoptotic factor 1 | 1.170        | -                 | -                  |
| EGR1                                         | Early growth response 1               | 4.743        | 1.379             | 0.67               |
| <b>AP-1</b>                                  |                                       |              |                   |                    |
| JUN                                          | Jun proto-oncogene                    | 3.469        | 0.848             | 3.20               |
| JUNB                                         | JunB proto-oncogene                   | 1.552        | 1.070             | 0.95               |
| JUND                                         | JunD proto-oncogene                   | 1.495        | -                 | 1.31               |
| FOSB                                         | FosB proto-oncogene                   | 7.689        | 3.000             | 2.48               |
| FOS                                          | Fos proto-oncogene                    | 4.131        | -                 | 1.36               |
| FOSL1                                        | FOS like 1                            | 3.233        | 2.233             | 1.66               |
| FOSL2                                        | FOS like 2                            | 1.814        | 0.766             | 1.14               |

**Supplementary figure S4: Meta-analysis of potential upstream regulators of the transcriptomic response**

**a)** Overlap of significantly downregulated genes (>2-fold,  $P < 0.05$ ) between our RNA-seq dataset derived from digitonin-injured MCF-7 breast cancer cells and two others from ionomycin-treated MCF7 breast cancer cells (Wales *et al.*, 2016) and mechanically stretched cardiomyocytes (Rysä *et al.*, 2018).

**b)** Potential upstream transcriptional regulators responsible for the mRNA changes detected for the three post-injury RNA-seq datasets (predicted by the Ingenuity Pathway Analysis). These upstream transcriptional regulators are significantly associated to the dataset ( $-\log(p\text{-value}) > 1.3$ ) and have a z-score that reflects their predicted activation state (a positive/negative z-score indicates activation/inhibition) – plotted in the heatmap.

**c)** Log<sub>2</sub> fold changes of the predicted upstream regulators (with  $P < 0.05$ ) that were identified across the datasets included in the meta-analysis.

**Supplementary Table S1:** List of significantly upregulated differentially expressed genes obtained from RNA-sequencing of digitonin-injured MCF-7 breast cancer cells at 20-, 40- and 60-min post-injury.

| 20 min timepoint |                 |         |                                                      |       |         |             |             |
|------------------|-----------------|---------|------------------------------------------------------|-------|---------|-------------|-------------|
| No.              | Ensemble ID     | Gene    | Full gene name                                       | logFC | F       | P value     | FDR         |
| 1                | ENSG00000120738 | EGR1    | Early growth response 1                              | 4.842 | 9989.66 | 3.30E-25    | 4.31E-21    |
| 2                | ENSG00000170345 | FOS     | Fos proto-oncogene                                   | 4.408 | 7190.79 | 5.54E-24    | 3.61E-20    |
| 3                | ENSG00000123358 | NR4A1   | Nuclear receptor subfamily 4 group A member 1        | 5.865 | 6542.85 | 1.24E-23    | 5.41E-20    |
| 4                | ENSG00000177606 | JUN     | Jun proto-oncogene                                   | 3.069 | 3188.95 | 5.85E-21    | 1.91E-17    |
| 5                | ENSG00000179388 | EGR3    | Early growth response 3                              | 2.522 | 3090.91 | 7.64E-21    | 1.99E-17    |
| 6                | ENSG00000125740 | FOSB    | FosB proto-oncogene                                  | 6.784 | 2490.39 | 4.84E-20    | 1.05E-16    |
| 7                | ENSG00000160888 | IER2    | Immediate early response 2                           | 2.130 | 2091.31 | 2.15E-19    | 3.89E-16    |
| 8                | ENSG00000153234 | NR4A2   | Nuclear receptor subfamily 4 group A member 2        | 2.734 | 2065.22 | 2.39E-19    | 3.89E-16    |
| 9                | ENSG00000122877 | EGR2    | Early growth response 2                              | 6.749 | 1533.83 | 3.01E-18    | 4.36E-15    |
| 10               | ENSG00000062716 | VMP1    | Vacuole membrane protein 1                           | 1.372 | 1420.08 | 5.79E-18    | 7.54E-15    |
| 11               | ENSG00000108551 | RASD1   | Ras related dexamethasone induced 1                  | 2.837 | 1324.95 | 1.04E-17    | 1.24E-14    |
| 12               | ENSG00000120129 | DUSP1   | Dual specificity phosphatase 1                       | 2.718 | 1051.65 | 7.39E-17    | 8.03E-14    |
| 13               | ENSG00000162772 | ATF3    | Activating transcription factor 3                    | 3.201 | 809.00  | 6.76E-16    | 6.79E-13    |
| 14               | ENSG00000171223 | JUNB    | JunB proto-oncogene                                  | 1.477 | 776.56  | 9.55E-16    | 8.89E-13    |
| 15               | ENSG00000128016 | ZFP36   | ZFP36 ring finger protein                            | 1.457 | 732.32  | 1.56E-15    | 1.36E-12    |
| 16               | ENSG00000142871 | CYR61   | Cysteine rich angiogenic inducer 61                  | 2.613 | 661.73  | 3.66E-15    | 2.98E-12    |
| 17               | ENSG00000159200 | RCAN1   | Regulator of calcineurin 1                           | 2.870 | 516.11  | 2.92E-14    | 2.12E-11    |
| 18               | ENSG00000118523 | CTGF    | Connective tissue growth factor                      | 5.831 | 465.70  | 6.87E-14    | 4.72E-11    |
| 19               | ENSG00000144655 | CSRNP1  | Cysteine and serine rich nuclear protein 1           | 1.335 | 448.20  | 9.45E-14    | 6.16E-11    |
| 20               | ENSG00000135625 | EGR4    | Early growth response 4                              | 5.488 | 444.49  | 1.01E-13    | 6.28E-11    |
| 21               | ENSG00000164949 | GEM     | GTP binding protein overexpressed in skeletal muscle | 3.510 | 377.14  | 3.93E-13    | 2.33E-10    |
| 22               | ENSG00000130513 | GDF15   | Growth differentiation factor 15                     | 1.285 | 245.86  | 1.29E-11    | 7.00E-09    |
| 23               | ENSG00000179094 | PER1    | Period circadian clock 1                             | 1.121 | 102.61  | 1.15E-08    | 4.18E-06    |
| 24               | ENSG00000162891 | IL20    | Interleukin 20                                       | 1.387 | 91.82   | 2.61E-08    | 8.52E-06    |
| 25               | ENSG00000119508 | NR4A3   | Nuclear receptor subfamily 4 group A member 3        | 1.612 | 83.36   | 5.27E-08    | 1.56E-05    |
| 26               | ENSG00000135346 | CGA     | Glycoprotein hormones                                | 3.933 | 61.79   | 4.31E-07    | 0.000102455 |
| 27               | ENSG00000105219 | CNTD2   | Cyclin N-terminal domain containing 2                | 1.330 | 23.97   | 0.000132207 | 0.014365355 |
| 28               | ENSG00000186352 | ANKRD37 | Ankyrin repeat domain 37                             | 1.112 | 23.88   | 0.000134938 | 0.014540965 |
| 29               | ENSG00000102195 | GPR50   | G protein-coupled receptor 50                        | 3.274 | 23.68   | 0.000140998 | 0.015069471 |
| 30               | ENSG00000172803 | SNX32   | Sorting nexin 32                                     | 1.740 | 23.25   | 0.000154656 | 0.016262597 |
| 31               | ENSG00000112309 | B3GAT2  | Beta-1                                               | 1.731 | 21.37   | 0.000236688 | 0.02173359  |
| 32               | ENSG00000142178 | SIK1    | Salt inducible kinase 1                              | 2.188 | 18.59   | 0.000462708 | 0.038185087 |
| 33               | ENSG00000139278 | GLIPR1  | GLI pathogenesis related 1                           | 1.020 | 17.18   | 0.000664156 | 0.048110741 |
| 40 min timepoint |                 |         |                                                      |       |         |             |             |
| No.              | Ensemble ID     | Gene    | Full gene name                                       | logFC | F       | P value     | FDR         |
| 1                | ENSG00000125740 | FOSB    | FosB proto-oncogene                                  | 7.718 | 3999.24 | 2.34E-23    | 3.38E-20    |
| 2                | ENSG00000122877 | EGR2    | Early growth response 2                              | 7.446 | 2561.61 | 1.50E-21    | 1.63E-18    |
| 3                | ENSG00000119508 | NR4A3   | Nuclear receptor subfamily 4 group A member 3        | 7.217 | 6559.82 | 2.28E-25    | 9.86E-22    |
| 4                | ENSG00000135625 | EGR4    | Early growth response 4                              | 7.087 | 1509.06 | 2.07E-19    | 1.42E-16    |
| 5                | ENSG00000123358 | NR4A1   | Nuclear receptor subfamily 4 group A member 1        | 6.595 | 8987.74 | 1.19E-22    | 1.11E-22    |

| No. | Ensemble ID     | Gene     | Full gene name                                       | logFC | F       | P value   | FDR         |
|-----|-----------------|----------|------------------------------------------------------|-------|---------|-----------|-------------|
| 6   | ENSG00000118523 | CTGF     | Connective tissue growth factor                      | 6.288 | 1693.19 | 7.10E-20  | 6.15E-17    |
| 7   | ENSG00000135346 | CGA      | Glycoprotein hormones                                | 6.141 | 369.92  | 8.09E-14  | 2.10E-11    |
| 8   | ENSG00000164949 | GEM      | GTP binding protein overexpressed in skeletal muscle | 5.578 | 1374.09 | 4.94E-19  | 3.06E-16    |
| 9   | ENSG00000120738 | EGR1     | Early growth response 1                              | 5.099 | 8648.81 | 1.71E-26  | 1.11E-22    |
| 10  | ENSG00000162772 | ATF3     | Activating transcription factor 3                    | 5.082 | 4840.52 | 3.92E-24  | 7.28E-21    |
| 11  | ENSG00000102195 | GPR50    | G protein-coupled receptor 50                        | 4.647 | 85.81   | 1.96E-08  | 1.76E-06    |
| 12  | ENSG00000170345 | FOS      | Fos proto-oncogene                                   | 4.459 | 6361.50 | 3.04E-25  | 9.86E-22    |
| 13  | ENSG00000159200 | RCAN1    | Regulator of calcineurin 1                           | 4.235 | 3445.61 | 9.43E-23  | 1.22E-19    |
| 14  | ENSG00000177606 | JUN      | Jun proto-oncogene                                   | 3.614 | 4686.00 | 5.31E-24  | 8.63E-21    |
| 15  | ENSG00000198732 | SMOC1    | SPARC related modular calcium binding 1              | 3.592 | 106.02  | 3.68E-09  | 3.62E-07    |
| 16  | ENSG00000153234 | NR4A2    | Nuclear receptor subfamily 4 group A member 2        | 3.501 | 5016.79 | 2.81E-24  | 6.47E-21    |
| 17  | ENSG00000108551 | RASD1    | Ras related dexamethasone induced 1                  | 3.386 | 2001.99 | 1.49E-20  | 1.49E-17    |
| 18  | ENSG00000185022 | MAFF     | MAF bZIP transcription factor F                      | 3.248 | 732.69  | 1.64E-16  | 6.44E-14    |
| 19  | ENSG00000120129 | DUSP1    | Dual specificity phosphatase 1                       | 3.172 | 1711.36 | 6.43E-20  | 5.97E-17    |
| 20  | ENSG00000142871 | CYR61    | Cysteine rich angiogenic inducer 61                  | 3.172 | 1639.22 | 9.60E-20  | 7.34E-17    |
| 21  | ENSG00000185950 | IRS2     | Insulin receptor substrate 2                         | 3.166 | 960.69  | 1.35E-17  | 6.51E-15    |
| 22  | ENSG00000179388 | EGR3     | Early growth response 3                              | 3.093 | 4982.99 | 2.99E-24  | 6.47E-21    |
| 23  | ENSG00000171522 | PTGER4   | Prostaglandin E receptor 4                           | 2.886 | 72.90   | 6.86E-08  | 5.34E-06    |
| 24  | ENSG00000222009 | BTBD19   | BTB domain containing 19                             | 2.886 | 200.28  | 1.80E-11  | 3.34E-09    |
| 25  | ENSG00000179094 | PER1     | Period circadian clock 1                             | 2.812 | 1074.14 | 4.83E-18  | 2.51E-15    |
| 26  | ENSG00000142178 | SIK1     | Salt inducible kinase 1                              | 2.763 | 26.92   | 5.41E-05  | 0.001654033 |
| 27  | ENSG00000167874 | TMEM88   | Transmembrane protein 88                             | 2.482 | 144.34  | 2.92E-10  | 3.68E-08    |
| 28  | ENSG00000175592 | FOSL1    | FOS like 1                                           | 2.390 | 185.12  | 3.54E-11  | 5.98E-09    |
| 29  | ENSG00000144655 | CSRN1P1  | Cysteine and serine rich nuclear protein 1           | 2.389 | 1646.61 | 9.21E-20  | 7.34E-17    |
| 30  | ENSG00000087074 | PPP1R15A | Protein phosphatase 1 regulatory subunit 15A         | 2.370 | 1126.54 | 3.11E-18  | 1.68E-15    |
| 31  | ENSG00000160888 | IER2     | Immediate early response 2                           | 2.367 | 2690.10 | 9.51E-22  | 1.12E-18    |
| 32  | ENSG00000078804 | TP53INP2 | Tumor protein p53 inducible nuclear protein 2        | 2.348 | 443.02  | 1.60E-14  | 4.74E-12    |
| 33  | ENSG00000116741 | RGS2     | Regulator of G-protein signaling 2                   | 2.275 | 46.88   | 1.65E-06  | 9.38E-05    |
| 34  | ENSG00000059804 | SLC2A3   | Solute carrier family 2 member 3                     | 2.250 | 22.25   | 0.0001543 | 0.00382569  |
| 35  | ENSG00000205869 | KRTAP5-1 | Keratin associated protein 5-1                       | 2.177 | 32.04   | 1.94E-05  | 0.000723168 |
| 36  | ENSG00000188396 | TCTEX1D4 | Tctex1 domain containing 4                           | 2.156 | 25.40   | 7.51E-05  | 0.002127266 |
| 37  | ENSG00000130513 | GDF15    | Growth differentiation factor 15                     | 2.138 | 779.74  | 9.24E-17  | 3.87E-14    |
| 38  | ENSG00000173334 | TRIB1    | Tribbles pseudokinase 1                              | 2.029 | 1518.06 | 1.96E-19  | 1.41E-16    |
| 39  | ENSG00000261150 | EPPK1    | Epiplakin 1                                          | 1.977 | 887.62  | 2.81E-17  | 1.26E-14    |
| 40  | ENSG00000167604 | NFKBID   | NFKB inhibitor delta                                 | 1.960 | 716.84  | 2.00E-16  | 7.64E-14    |
| 41  | ENSG00000089692 | LAG3     | Lymphocyte activating 3                              | 1.937 | 29.12   | 3.43E-05  | 0.001134305 |
| 42  | ENSG00000117228 | GBP1     | Guanylate binding protein 1                          | 1.930 | 53.83   | 6.33E-07  | 3.97E-05    |
| 43  | ENSG00000211448 | DIO2     | Deiodinase                                           | 1.918 | 69.39   | 9.94E-08  | 7.51E-06    |
| 44  | ENSG00000139289 | PHLDA1   | Pleckstrin homology like domain family A member 1    | 1.871 | 961.02  | 1.35E-17  | 6.51E-15    |
| 45  | ENSG00000171223 | JUNB     | JunB proto-oncogene                                  | 1.859 | 1147.16 | 2.63E-18  | 1.48E-15    |
| 46  | ENSG00000186352 | ANKRD37  | Ankyrin repeat domain 37                             | 1.854 | 92.46   | 1.09E-08  | 1.01E-06    |
| 47  | ENSG00000128016 | ZFP36    | ZFP36 ring finger protein                            | 1.810 | 1150.12 | 2.57E-18  | 1.48E-15    |
| 48  | ENSG00000127528 | KLF2     | Kruppel like factor 2                                | 1.805 | 124.52  | 9.93E-10  | 1.13E-07    |

| No. | Ensemble ID     | Gene    | Full gene name                                         | logFC | F       | P value     | FDR         |
|-----|-----------------|---------|--------------------------------------------------------|-------|---------|-------------|-------------|
| 49  | ENSG00000165029 | ABCA1   | ATP binding cassette subfamily A member 1              | 1.772 | 12.15   | 0.002508064 | 0.032913909 |
| 50  | ENSG00000118503 | TNFAIP3 | TNF alpha induced protein 3                            | 1.661 | 46.77   | 1.68E-06    | 9.46E-05    |
| 51  | ENSG00000139278 | GLIPR1  | GLI pathogenesis related 1                             | 1.656 | 58.73   | 3.39E-07    | 2.25E-05    |
| 52  | ENSG00000146278 | PNRC1   | Proline rich nuclear receptor coactivator 1            | 1.634 | 507.75  | 4.65E-15    | 1.55E-12    |
| 53  | ENSG00000130066 | SAT1    | Spermidine/spermine N1-acetyltransferase 1             | 1.631 | 647.72  | 5.06E-16    | 1.82E-13    |
| 54  | ENSG00000171303 | KCNK3   | Potassium two pore domain channel subfamily K member 3 | 1.581 | 12.69   | 0.002108333 | 0.028863507 |
| 55  | ENSG00000169744 | LDB2    | LIM domain binding 2                                   | 1.581 | 11.88   | 0.00273803  | 0.034946381 |
| 56  | ENSG00000107968 | MAP3K8  | Mitogen-activated protein kinase kinase 8              | 1.567 | 282.81  | 8.84E-13    | 2.01E-10    |
| 57  | ENSG00000112309 | B3GAT2  | Beta-1                                                 | 1.562 | 16.89   | 0.000608193 | 0.011418554 |
| 58  | ENSG00000105219 | CNTD2   | Cyclin N-terminal domain containing 2                  | 1.553 | 35.78   | 9.79E-06    | 0.000415596 |
| 59  | ENSG00000184545 | DUSP8   | Dual specificity phosphatase 8                         | 1.552 | 481.37  | 7.54E-15    | 2.39E-12    |
| 60  | ENSG00000181856 | SLC2A4  | Solute carrier family 2 member 4                       | 1.551 | 12.30   | 0.00238758  | 0.031652483 |
| 61  | ENSG00000153487 | ING1    | Inhibitor of growth family member 1                    | 1.523 | 645.22  | 5.24E-16    | 1.84E-13    |
| 62  | ENSG00000136826 | KLF4    | Kruppel like factor 4                                  | 1.504 | 380.38  | 6.30E-14    | 1.67E-11    |
| 63  | ENSG00000143384 | MCL1    | BCL2 family apoptosis regulator                        | 1.477 | 1498.22 | 2.21E-19    | 1.44E-16    |
| 64  | ENSG00000062716 | VMP1    | Vacuole membrane protein 1                             | 1.467 | 933.88  | 1.76E-17    | 8.15E-15    |
| 65  | ENSG00000004799 | PDK4    | Pyruvate dehydrogenase kinase 4                        | 1.453 | 25.25   | 7.77E-05    | 0.002188453 |
| 66  | ENSG00000140465 | CYP11A1 | Cytochrome P450 family 1 subfamily A member 1          | 1.433 | 20.52   | 0.000234777 | 0.005379579 |
| 67  | ENSG00000140511 | HAPLN3  | Hyaluronan and proteoglycan link protein 3             | 1.398 | 10.72   | 0.004034738 | 0.046265944 |
| 68  | ENSG00000153443 | UBALD1  | UBA like domain containing 1                           | 1.375 | 601.58  | 9.93E-16    | 3.40E-13    |
| 69  | ENSG00000125657 | TNFSF9  | Tumor necrosis factor superfamily member 9             | 1.365 | 50.34   | 1.01E-06    | 6.09E-05    |
| 70  | ENSG00000188785 | ZNF548  | Zinc finger protein 548                                | 1.357 | 128.48  | 7.68E-10    | 8.98E-08    |
| 71  | ENSG00000111859 | NEDD9   | Neural precursor cell expressed                        | 1.357 | 154.12  | 1.68E-10    | 2.28E-08    |
| 72  | ENSG00000075426 | FOSL2   | FOS like 2                                             | 1.355 | 872.29  | 3.29E-17    | 1.43E-14    |
| 73  | ENSG00000130775 | THEMIS2 | Thymocyte selection associated family member 2         | 1.347 | 10.83   | 0.003882568 | 0.045199217 |
| 74  | ENSG00000168874 | ATOX8   | Atonal bHLH transcription factor 8                     | 1.347 | 12.50   | 0.002239738 | 0.030122852 |
| 75  | ENSG00000120875 | DUSP4   | Dual specificity phosphatase 4                         | 1.339 | 737.22  | 1.55E-16    | 6.27E-14    |
| 76  | ENSG00000171790 | SLFN11  | Schlafen like 1                                        | 1.322 | 19.02   | 0.0003442   | 0.007379281 |
| 77  | ENSG00000162891 | IL20    | Interleukin 20                                         | 1.314 | 83.81   | 2.36E-08    | 2.04E-06    |
| 78  | ENSG00000129951 | PLPPR3  | Phospholipid phosphatase related 3                     | 1.288 | 10.57   | 0.004251797 | 0.048117903 |
| 79  | ENSG00000172602 | RND1    | Rho family GTPase 1                                    | 1.238 | 149.02  | 2.23E-10    | 2.87E-08    |
| 80  | ENSG00000172061 | LRRCL5  | Leucine rich repeat containing 15                      | 1.232 | 37.14   | 7.72E-06    | 0.000344853 |
| 81  | ENSG00000115844 | DLX2    | Distal-less homeobox 2                                 | 1.213 | 25.06   | 8.11E-05    | 0.002264916 |
| 82  | ENSG00000137331 | IER3    | Immediate early response 3                             | 1.198 | 442.79  | 1.60E-14    | 4.74E-12    |
| 83  | ENSG00000165997 | ARL5B   | ADP ribosylation factor like GTPase 5B                 | 1.161 | 500.27  | 5.32E-15    | 1.73E-12    |
| 84  | ENSG00000188001 | TPRG1   | Tumor protein p63 regulated 1                          | 1.149 | 15.21   | 0.000981316 | 0.016387215 |
| 85  | ENSG00000124882 | EREG    | Epiregulin                                             | 1.147 | 19.05   | 0.000341547 | 0.00733452  |
| 86  | ENSG00000130522 | JUND    | JunD proto-oncogene                                    | 1.145 | 167.30  | 8.41E-11    | 1.24E-08    |
| 87  | ENSG00000159556 | ISL2    | ISL LIM homeobox 2                                     | 1.128 | 16.27   | 0.000722665 | 0.013022009 |
| 88  | ENSG00000114541 | FRMD4B  | FERM domain containing 4B                              | 1.121 | 215.82  | 9.44E-12    | 1.86E-09    |
| 89  | ENSG00000158050 | DUSP2   | Dual specificity phosphatase 2                         | 1.109 | 122.17  | 1.16E-09    | 1.30E-07    |
| 90  | ENSG00000163660 | CCNL1   | Cyclin L1                                              | 1.104 | 664.54  | 4.00E-16    | 1.48E-13    |
| 91  | ENSG00000134107 | BHLHE40 | Basic helix-loop-helix family member e40               | 1.080 | 434.20  | 1.92E-14    | 5.41E-12    |



| No. | Ensemble ID     | Gene    | Full gene name                                      | logFC | F      | P value  | FDR         |
|-----|-----------------|---------|-----------------------------------------------------|-------|--------|----------|-------------|
| 92  | ENSG00000171174 | RBKS    | Ribokinase                                          | 1.067 | 61.74  | 2.36E-07 | 1.63E-05    |
| 93  | ENSG00000198576 | ARC     | Activity regulated cytoskeleton associated protein  | 1.066 | 48.32  | 1.34E-06 | 7.80E-05    |
| 94  | ENSG00000221995 | TIAF1   | TGFB1-induced anti-apoptotic factor 1               | 1.034 | 32.48  | 1.78E-05 | 0.00068583  |
| 95  | ENSG00000197019 | SERTAD1 | SERTA domain containing 1                           | 1.034 | 295.21 | 6.04E-13 | 1.40E-10    |
| 96  | ENSG00000204618 | RNF39   | Ring finger protein 39                              | 1.025 | 41.99  | 3.47E-06 | 0.000177593 |
| 97  | ENSG00000112658 | SRF     | Serum response factor                               | 1.023 | 438.68 | 1.75E-14 | 5.04E-12    |
| 98  | ENSG00000109321 | AREG    | Amphiregulin                                        | 1.021 | 223.29 | 7.02E-12 | 1.42E-09    |
| 99  | ENSG00000055483 | USP36   | Ubiquitin specific peptidase 36                     | 1.016 | 398.71 | 4.13E-14 | 1.12E-11    |
| 100 | ENSG00000136997 | MYC     | V-myc avian myelocytomatosis viral oncogene homolog | 1.009 | 471.45 | 9.10E-15 | 2.82E-12    |
| 101 | ENSG00000019186 | CYP24A1 | Cytochrome P450 family 24 subfamily A member 1      | 1.007 | 189.60 | 2.89E-11 | 5.00E-09    |
| 102 | ENSG00000163659 | TIPARP  | TCDD inducible poly(ADP-ribose) polymerase          | 1.005 | 189.04 | 2.96E-11 | 5.06E-09    |

### 60 min timepoint

| No. | Ensemble ID     | Gene     | Full gene name                                       | logFC | F        | P value  | FDR         |
|-----|-----------------|----------|------------------------------------------------------|-------|----------|----------|-------------|
| 1   | ENSG00000119508 | NR4A3    | Nuclear receptor subfamily 4 group A member 3        | 7.788 | 5967.51  | 3.50E-27 | 1.14E-23    |
| 2   | ENSG00000125740 | FOSB     | FosB proto-oncogene                                  | 7.689 | 5703.40  | 5.61E-27 | 1.22E-23    |
| 3   | ENSG00000135625 | EGR4     | Early growth response 4                              | 7.534 | 1894.86  | 5.27E-22 | 4.03E-19    |
| 4   | ENSG00000122877 | EGR2     | Early growth response 2                              | 7.157 | 2158.71  | 1.37E-22 | 1.27E-19    |
| 5   | ENSG00000135346 | CGA      | Glycoprotein hormones                                | 6.760 | 530.02   | 2.44E-16 | 4.47E-14    |
| 6   | ENSG00000123358 | NR4A1    | Nuclear receptor subfamily 4 group A member 1        | 6.555 | 11619.72 | 3.35E-30 | 4.36E-26    |
| 7   | ENSG00000164949 | GEM      | GTP binding protein overexpressed in skeletal muscle | 5.796 | 2292.62  | 7.32E-23 | 7.94E-20    |
| 8   | ENSG00000118523 | CTGF     | Connective tissue growth factor                      | 5.778 | 730.19   | 9.50E-18 | 2.29E-15    |
| 9   | ENSG00000162772 | ATF3     | Activating transcription factor 3                    | 5.539 | 6484.61  | 1.47E-27 | 6.38E-24    |
| 10  | ENSG00000102195 | GPR50    | G protein-coupled receptor 50                        | 5.053 | 104.18   | 1.41E-09 | 6.95E-08    |
| 11  | ENSG00000169429 | CXCL8    | C-X-C motif chemokine ligand 8                       | 4.913 | 108.96   | 9.49E-10 | 4.88E-08    |
| 12  | ENSG00000120738 | EGR1     | Early growth response 1                              | 4.743 | 7080.65  | 5.88E-28 | 3.83E-24    |
| 13  | ENSG00000159200 | RCAN1    | Regulator of calcineurin 1                           | 4.444 | 2270.75  | 8.08E-23 | 8.09E-20    |
| 14  | ENSG00000185022 | MAFF     | MAF bZIP transcription factor F                      | 4.327 | 1490.15  | 6.31E-21 | 3.04E-18    |
| 15  | ENSG00000198732 | SMOC1    | SPARC related modular calcium binding 1              | 4.203 | 213.29   | 1.92E-12 | 1.70E-10    |
| 16  | ENSG00000170345 | FOS      | Fos proto-oncogene                                   | 4.131 | 4937.21  | 2.52E-26 | 4.44E-23    |
| 17  | ENSG00000222009 | BTBD19   | BTB domain containing 19                             | 4.005 | 660.74   | 2.62E-17 | 5.51E-15    |
| 18  | ENSG00000118503 | TNFAIP3  | TNF alpha induced protein 3                          | 3.878 | 558.92   | 1.43E-16 | 2.69E-14    |
| 19  | ENSG00000185950 | IRS2     | Insulin receptor substrate 2                         | 3.530 | 1229.22  | 4.59E-20 | 1.87E-17    |
| 20  | ENSG00000177606 | JUN      | Jun proto-oncogene                                   | 3.469 | 5738.75  | 5.26E-27 | 1.22E-23    |
| 21  | ENSG00000179094 | PER1     | Period circadian clock 1                             | 3.324 | 1681.84  | 1.81E-21 | 1.18E-18    |
| 22  | ENSG00000188396 | TCTEX1D4 | Tctex1 domain containing 4                           | 3.249 | 72.69    | 3.02E-08 | 1.07E-06    |
| 23  | ENSG00000175592 | FOSL1    | FOS like 1                                           | 3.233 | 412.83   | 2.99E-15 | 4.69E-13    |
| 24  | ENSG00000153234 | NR4A2    | Nuclear receptor subfamily 4 group A member 2        | 3.219 | 4495.31  | 6.69E-26 | 9.68E-23    |
| 25  | ENSG00000205085 | FAM71F2  | Family with sequence similarity 71 member F2         | 3.081 | 23.22    | 9.31E-05 | 0.001039632 |
| 26  | ENSG00000140465 | CYP11A1  | Cytochrome P450 family 1 subfamily A member 1        | 2.995 | 163.09   | 2.42E-11 | 1.81E-09    |
| 27  | ENSG00000108551 | RASD1    | Ras related dexamethasone induced 1                  | 2.910 | 1655.06  | 2.13E-21 | 1.32E-18    |
| 28  | ENSG00000087074 | PPP1R15A | Protein phosphatase 1 regulatory subunit 15A         | 2.906 | 1631.09  | 2.48E-21 | 1.47E-18    |

| No. | Ensemble ID     | Gene      | Full gene name                                     | logFC | F       | P value     | FDR         |
|-----|-----------------|-----------|----------------------------------------------------|-------|---------|-------------|-------------|
| 29  | ENSG00000116741 | RGS2      | Regulator of G-protein signaling 2                 | 2.813 | 83.77   | 9.24E-09    | 3.81E-07    |
| 30  | ENSG00000205869 | KRTAP5-1  | Keratin associated protein 5-1                     | 2.796 | 68.39   | 4.97E-08    | 1.64E-06    |
| 31  | ENSG00000078804 | TP53INP2  | Tumor protein p53 inducible nuclear protein 2      | 2.782 | 718.52  | 1.12E-17    | 2.60E-15    |
| 32  | ENSG00000179388 | EGR3      | Early growth response 3                            | 2.749 | 4899.94 | 2.73E-26    | 4.44E-23    |
| 33  | ENSG00000139178 | C1RL      | Complement C1r subcomponent like                   | 2.745 | 17.11   | 0.000472338 | 0.003953361 |
| 34  | ENSG00000120129 | DUSP1     | Dual specificity phosphatase 1                     | 2.728 | 974.21  | 5.00E-19    | 1.86E-16    |
| 35  | ENSG00000142871 | CYR61     | Cysteine rich angiogenic inducer 61                | 2.723 | 1205.70 | 5.60E-20    | 2.21E-17    |
| 36  | ENSG00000171522 | PTGER4    | Prostaglandin E receptor 4                         | 2.710 | 61.78   | 1.12E-07    | 3.34E-06    |
| 37  | ENSG00000023445 | BIRC3     | Baculoviral IAP repeat containing 3                | 2.667 | 32.62   | 1.16E-05    | 0.000178475 |
| 38  | ENSG00000173334 | TRIB1     | Tribbles pseudokinase 1                            | 2.644 | 2512.40 | 2.83E-23    | 3.35E-20    |
| 39  | ENSG00000136826 | KLF4      | Kruppel like factor 4                              | 2.632 | 1361.40 | 1.60E-20    | 7.45E-18    |
| 40  | ENSG00000167874 | TMEM88    | Transmembrane protein 88                           | 2.629 | 162.66  | 2.48E-11    | 1.85E-09    |
| 41  | ENSG00000211448 | DIO2      | Deiodinase                                         | 2.561 | 165.33  | 2.13E-11    | 1.64E-09    |
| 42  | ENSG00000144655 | CSRNP1    | Cysteine and serine rich nuclear protein 1         | 2.542 | 2060.70 | 2.21E-22    | 1.92E-19    |
| 43  | ENSG00000128342 | LIF       | Leukemia inhibitory factor                         | 2.503 | 782.89  | 4.67E-18    | 1.34E-15    |
| 44  | ENSG00000139289 | PHLDA1    | Pleckstrin homology like domain family A member 1  | 2.498 | 1877.37 | 5.80E-22    | 4.19E-19    |
| 45  | ENSG00000115844 | DLX2      | Distal-less homeobox 2                             | 2.462 | 138.91  | 1.07E-10    | 6.87E-09    |
| 46  | ENSG00000198576 | ARC       | Activity regulated cytoskeleton associated protein | 2.226 | 300.34  | 6.96E-14    | 8.31E-12    |
| 47  | ENSG00000104856 | RELB      | RELB proto-oncogene                                | 2.209 | 103.55  | 1.49E-09    | 7.30E-08    |
| 48  | ENSG00000261150 | EPPK1     | Epiplakin 1                                        | 2.202 | 1942.38 | 4.08E-22    | 3.32E-19    |
| 49  | ENSG00000180353 | HCLS1     | Hematopoietic cell-specific Lyn substrate 1        | 2.169 | 24.02   | 7.65E-05    | 0.000883787 |
| 50  | ENSG00000127528 | KLF2      | Kruppel like factor 2                              | 2.167 | 240.90  | 5.96E-13    | 5.88E-11    |
| 51  | ENSG00000142178 | SIK1      | Salt inducible kinase 1                            | 2.145 | 16.99   | 0.000488226 | 0.004060231 |
| 52  | ENSG00000130775 | THEMIS2   | Thymocyte selection associated family member 2     | 2.143 | 33.74   | 9.28E-06    | 0.000149087 |
| 53  | ENSG00000125787 | GNRH2     | Gonadotropin releasing hormone 2                   | 2.101 | 22.10   | 0.000122852 | 0.001309519 |
| 54  | ENSG00000164761 | TNFRSF11B | TNF receptor superfamily member 11b                | 2.086 | 102.53  | 1.62E-09    | 7.85E-08    |
| 55  | ENSG00000160888 | IER2      | Immediate early response 2                         | 2.047 | 1618.78 | 2.68E-21    | 1.52E-18    |
| 56  | ENSG00000185668 | POU3F1    | POU class 3 homeobox 1                             | 2.047 | 14.94   | 0.000902094 | 0.006716678 |
| 57  | ENSG00000197019 | SERTAD1   | SERTA domain containing 1                          | 1.995 | 1189.94 | 6.41E-20    | 2.45E-17    |
| 58  | ENSG00000147509 | RGS20     | Regulator of G-protein signaling 20                | 1.995 | 20.22   | 0.000200182 | 0.001958924 |
| 59  | ENSG00000165029 | ABCA1     | ATP binding cassette subfamily A member 1          | 1.977 | 15.81   | 0.000691413 | 0.005369179 |
| 60  | ENSG00000130066 | SAT1      | Spermidine/spermine N1-acetyltransferase 1         | 1.953 | 1510.06 | 5.50E-21    | 2.75E-18    |
| 61  | ENSG00000117228 | GBP1      | Guanylate binding protein 1                        | 1.944 | 44.53   | 1.35E-06    | 2.92E-05    |
| 62  | ENSG00000143507 | DUSP10    | Dual specificity phosphatase 10                    | 1.942 | 69.08   | 4.58E-08    | 1.52E-06    |
| 63  | ENSG00000172738 | TMEM217   | Transmembrane protein 217                          | 1.937 | 15.58   | 0.000742599 | 0.005708754 |
| 64  | ENSG00000089692 | LAG3      | Lymphocyte activating 3                            | 1.915 | 30.39   | 1.83E-05    | 0.000263604 |
| 65  | ENSG00000055483 | USP36     | Ubiquitin specific peptidase 36                    | 1.911 | 1769.98 | 1.07E-21    | 7.30E-19    |
| 66  | ENSG00000130513 | GDF15     | Growth differentiation factor 15                   | 1.902 | 697.76  | 1.51E-17    | 3.38E-15    |
| 67  | ENSG00000167604 | NFKBID    | NFKB inhibitor delta                               | 1.894 | 748.04  | 7.43E-18    | 1.90E-15    |
| 68  | ENSG00000146278 | PNRC1     | Proline rich nuclear receptor coactivator 1        | 1.892 | 771.36  | 5.43E-18    | 1.50E-15    |
| 69  | ENSG00000164251 | F2RL1     | F2R like trypsin receptor 1                        | 1.879 | 613.79  | 5.54E-17    | 1.09E-14    |
| 70  | ENSG00000111012 | CYP27B1   | Cytochrome P450 family 27 subfamily B member 1     | 1.836 | 286.72  | 1.10E-13    | 1.22E-11    |
| 71  | ENSG00000138271 | GPR87     | G protein-coupled receptor 87                      | 1.829 | 237.51  | 6.83E-13    | 6.64E-11    |

| No. | Ensemble ID     | Gene      | Full gene name                                        | logFC | F       | P value     | FDR          |
|-----|-----------------|-----------|-------------------------------------------------------|-------|---------|-------------|--------------|
| 72  | ENSG00000186352 | ANKRD37   | Ankyrin repeat domain 37                              | 1.827 | 91.39   | 4.40E-09    | 1.92E-07     |
| 73  | ENSG00000019549 | SNAI2     | Snail family transcriptional repressor 2              | 1.815 | 26.98   | 3.84E-05    | 0.000499351  |
| 74  | ENSG00000075426 | FOSL2     | FOS like 2                                            | 1.814 | 1539.65 | 4.50E-21    | 2.44E-18     |
| 75  | ENSG00000171873 | ADRA1D    | Adrenoceptor alpha 1D                                 | 1.805 | 17.28   | 0.000450256 | 0.003805248  |
| 76  | ENSG00000051523 | CYBA      | Cytochrome b-245 alpha chain                          | 1.797 | 83.81   | 9.21E-09    | 3.81E-07     |
| 77  | ENSG00000187726 | DNAJB13   | DnaI heat shock protein family (Hsp40) member B13     | 1.792 | 16.03   | 0.000647959 | 0.005092506  |
| 78  | ENSG00000113070 | HBEGF     | Heparin binding EGF like growth factor                | 1.782 | 134.94  | 1.39E-10    | 8.70E-09     |
| 79  | ENSG00000139278 | GLIPR1    | GLI pathogenesis related 1                            | 1.754 | 55.82   | 2.48E-07    | 6.68E-06     |
| 80  | ENSG00000143384 | MCL1      | BCL2 family apoptosis regulator                       | 1.751 | 2674.04 | 1.48E-23    | 1.93E-20     |
| 81  | ENSG00000168874 | ATOH8     | Atonal bHLH transcription factor 8                    | 1.726 | 19.63   | 0.00023403  | 0.002233069  |
| 82  | ENSG00000144063 | MAL       | Mal                                                   | 1.723 | 60.30   | 1.36E-07    | 3.96E-06     |
| 83  | ENSG00000086544 | ITPKC     | Inositol-trisphosphate 3-kinase C                     | 1.719 | 897.27  | 1.16E-18    | 3.97E-16     |
| 84  | ENSG00000111859 | NEDD9     | Neural precursor cell expressed                       | 1.718 | 288.65  | 1.03E-13    | 1.15E-11     |
| 85  | ENSG00000169548 | ZNF280A   | Zinc finger protein 280A                              | 1.700 | 12.03   | 0.002304756 | 0.014169295  |
| 86  | ENSG00000165917 | RAPSN     | Receptor associated protein of the synapse            | 1.700 | 12.38   | 0.002049834 | 0.012938209  |
| 87  | ENSG00000138347 | MYPN      | Myopalladin                                           | 1.644 | 20.75   | 0.000173684 | 0.00174275   |
| 88  | ENSG00000107968 | MAP3K8    | Mitogen-activated protein kinase kinase kinase 8      | 1.633 | 349.21  | 1.58E-14    | 2.16E-12     |
| 89  | ENSG00000059728 | MXD1      | MAX dimerization protein 1                            | 1.632 | 820.57  | 2.89E-18    | 8.75E-16     |
| 90  | ENSG00000100906 | NFKBIA    | NFKB inhibitor alpha                                  | 1.632 | 1513.35 | 5.38E-21    | 2.75E-18     |
| 91  | ENSG00000124882 | EREG      | Epiregulin                                            | 1.630 | 47.72   | 8.13E-07    | 1.88E-05     |
| 92  | ENSG00000184545 | DUSP8     | Dual specificity phosphatase 8                        | 1.626 | 569.31  | 1.19E-16    | 2.27E-14     |
| 93  | ENSG00000184270 | HIST2H2AB | Histone cluster 2 H2A family member b                 | 1.615 | 11.66   | 0.002619566 | 0.015617798  |
| 94  | ENSG00000155090 | KLF10     | Kruppel like factor 10                                | 1.590 | 971.30  | 5.15E-19    | 1.86E-16     |
| 95  | ENSG00000125657 | TNFSF9    | Tumor necrosis factor superfamily member 9            | 1.590 | 69.58   | 4.32E-08    | 1.45E-06     |
| 96  | ENSG00000116285 | ERRF1     | ERBB receptor feedback inhibitor 1                    | 1.582 | 1296.82 | 2.64E-20    | 1.15E-17     |
| 97  | ENSG00000205189 | ZBTB10    | Zinc finger and BTB domain containing 10              | 1.575 | 751.18  | 7.12E-18    | 1.85E-15     |
| 98  | ENSG00000128590 | DNAJB9    | DnaI heat shock protein family (Hsp40) member B9      | 1.572 | 413.45  | 2.95E-15    | 4.69E-13     |
| 99  | ENSG00000168386 | FILIP1L   | Filamin A interacting protein 1 like                  | 1.571 | 80.99   | 1.23E-08    | 4.90E-07     |
| 100 | ENSG00000172602 | RND1      | Rho family GTPase 1                                   | 1.569 | 274.85  | 1.66E-13    | 1.74E-11     |
| 101 | ENSG00000129749 | CHRNA10   | Cholinergic receptor nicotinic alpha 10 subunit       | 1.559 | 32.95   | 1.09E-05    | 0.000169195  |
| 102 | ENSG00000172061 | LRRCL15   | Leucine rich repeat containing 15                     | 1.555 | 58.17   | 1.80E-07    | 4.99E-06     |
| 103 | ENSG00000171223 | JUNB      | JunB proto-oncogene                                   | 1.552 | 828.51  | 2.62E-18    | 8.12E-16     |
| 104 | ENSG00000153443 | UBALD1    | UBA like domain containing 1                          | 1.539 | 868.60  | 1.62E-18    | 5.26E-16     |
| 105 | ENSG00000129951 | PLPPR3    | Phospholipid phosphatase related 3                    | 1.533 | 15.73   | 0.000708248 | 0.005473779  |
| 106 | ENSG00000153487 | ING1      | Inhibitor of growth family member 1                   | 1.532 | 650.77  | 3.06E-17    | 6.23E-15     |
| 107 | ENSG00000128016 | ZFP36     | ZFP36 ring finger protein                             | 1.532 | 723.54  | 1.04E-17    | 2.47E-15     |
| 108 | ENSG00000163659 | TIPARP    | TCDD inducible poly(ADP-ribose) polymerase            | 1.520 | 669.34  | 2.30E-17    | 4.99E-15     |
| 109 | ENSG00000188215 | DCUN1D3   | Defective in cullin neddylation 1 domain containing 3 | 1.516 | 327.98  | 2.93E-14    | 3.78E-12     |
| 110 | ENSG00000130522 | JUND      | JunD proto-oncogene                                   | 1.495 | 355.25  | 1.33E-14    | 1.88E-12     |
| 111 | ENSG00000114541 | FRMD4B    | FERM domain containing 4B                             | 1.477 | 479.82  | 6.64E-16    | 1.14E-13     |
| 112 | ENSG00000130164 | LDLR      | Low density lipoprotein receptor                      | 1.467 | 1250.28 | 3.85E-20    | 1.62E-17     |
| 113 | ENSG00000133639 | BTG1      | BTG anti-proliferation factor 1                       | 1.464 | 447.35  | 1.34E-15    | 2.18E-13     |
| 114 | ENSG00000198535 | C2CD4A    | C2 calcium dependent domain containing 4A             | 1.460 | 28.14   | 2.97E-05    | 0.0003999817 |

| No. | Ensemble ID     | Gene     | Full gene name                                                | logFC | F       | P value     | FDR         |
|-----|-----------------|----------|---------------------------------------------------------------|-------|---------|-------------|-------------|
| 115 | ENSG00000105219 | CNTD2    | Cyclin N-terminal domain containing 2                         | 1.411 | 23.56   | 8.56E-05    | 0.000971813 |
| 116 | ENSG00000164463 | CREBRF   | CREB3 regulatory factor                                       | 1.406 | 103.48  | 1.50E-09    | 7.32E-08    |
| 117 | ENSG00000100342 | APOL1    | Apolipoprotein L1                                             | 1.405 | 11.06   | 0.003220262 | 0.018414632 |
| 118 | ENSG00000116717 | GADD45A  | Growth arrest and DNA damage inducible alpha                  | 1.399 | 408.37  | 3.33E-15    | 5.16E-13    |
| 119 | ENSG00000143367 | TUFT1    | Tuftelin 1                                                    | 1.386 | 859.32  | 1.80E-18    | 5.73E-16    |
| 120 | ENSG00000157557 | ETS2     | ETS proto-oncogene 2                                          | 1.375 | 734.79  | 8.91E-18    | 2.19E-15    |
| 121 | ENSG00000132510 | KDM6B    | Lysine demethylase 6B                                         | 1.363 | 658.62  | 2.71E-17    | 5.60E-15    |
| 122 | ENSG00000258947 | TUBB3    | Tubulin beta 3 class III                                      | 1.360 | 56.99   | 2.12E-07    | 5.77E-06    |
| 123 | ENSG00000162461 | SLC25A34 | Solute carrier family 25 member 34                            | 1.355 | 20.56   | 0.000182657 | 0.001812982 |
| 124 | ENSG00000067082 | KLF6     | Kruppel like factor 6                                         | 1.352 | 292.26  | 9.10E-14    | 1.04E-11    |
| 125 | ENSG00000004799 | PKD4     | Pyruvate dehydrogenase kinase 4                               | 1.349 | 24.04   | 7.62E-05    | 0.000883214 |
| 126 | ENSG00000109321 | AREG     | Amphiregulin                                                  | 1.340 | 666.65  | 2.40E-17    | 5.11E-15    |
| 127 | ENSG00000188785 | ZNF548   | Zinc finger protein 548                                       | 1.335 | 114.40  | 6.16E-10    | 3.31E-08    |
| 128 | ENSG00000141682 | HMAIP1   | Phorbol-12-myristate-13-acetate-induced protein 1             | 1.333 | 233.80  | 7.95E-13    | 7.45E-11    |
| 129 | ENSG00000140511 | HAPLN3   | Hyaluronan and proteoglycan link protein 3                    | 1.321 | 7.95    | 0.010311978 | 0.045758742 |
| 130 | ENSG00000105131 | EPHX3    | Epoxide hydrolase 3                                           | 1.320 | 9.03    | 0.006769616 | 0.033048985 |
| 131 | ENSG00000179148 | ALOXE3   | Arachidonate lipoxygenase 3                                   | 1.318 | 27.42   | 3.48E-05    | 0.000457513 |
| 132 | ENSG00000174010 | KLHL15   | Kelch like family member 15                                   | 1.317 | 344.87  | 1.78E-14    | 2.39E-12    |
| 133 | ENSG00000141579 | ZNF750   | Zinc finger protein 750                                       | 1.307 | 63.38   | 9.16E-08    | 2.80E-06    |
| 134 | ENSG00000185304 | RGPD2    | RANBP2-like and GRIP domain containing 2                      | 1.305 | 46.68   | 9.58E-07    | 2.16E-05    |
| 135 | ENSG00000163874 | ZC3H12A  | Zinc finger CCH-type containing 12A                           | 1.297 | 368.57  | 9.24E-15    | 1.34E-12    |
| 136 | ENSG00000204386 | NEU1     | Neuraminidase 1                                               | 1.297 | 907.14  | 1.04E-18    | 3.65E-16    |
| 137 | ENSG00000166833 | NAV2     | Neuron navigator 2                                            | 1.287 | 180.20  | 9.52E-12    | 7.64E-10    |
| 138 | ENSG00000196428 | TSC2D2   | TSC22 domain family member 2                                  | 1.283 | 735.12  | 8.87E-18    | 2.19E-15    |
| 139 | ENSG00000165997 | ARL5B    | ADP ribosylation factor like GTPase 5B                        | 1.278 | 755.78  | 6.69E-18    | 1.81E-15    |
| 140 | ENSG00000150782 | IL18     | Interleukin 18                                                | 1.277 | 41.23   | 2.35E-06    | 4.65E-05    |
| 141 | ENSG00000134107 | BHLHE40  | Basic helix-loop-helix family member e40                      | 1.275 | 709.98  | 1.26E-17    | 2.89E-15    |
| 142 | ENSG00000062716 | VMP1     | Vacuole membrane protein 1                                    | 1.275 | 1308.26 | 2.41E-20    | 1.08E-17    |
| 143 | ENSG00000060662 | MAP3K14  | Mitogen-activated protein kinase kinase kinase 14             | 1.273 | 186.40  | 6.92E-12    | 5.70E-10    |
| 144 | ENSG00000182324 | KCNJ14   | Potassium voltage-gated channel subfamily J member 14         | 1.273 | 25.96   | 4.85E-05    | 0.000602136 |
| 145 | ENSG00000183742 | MACC1    | MACC1                                                         | 1.271 | 106.26  | 1.18E-09    | 5.88E-08    |
| 146 | ENSG00000120875 | DUSP4    | Dual specificity phosphatase 4                                | 1.263 | 796.58  | 3.91E-18    | 1.16E-15    |
| 147 | ENSG00000152433 | ZNF547   | Zinc finger protein 547                                       | 1.262 | 26.81   | 3.99E-05    | 0.000513438 |
| 148 | ENSG00000077150 | NFKB2    | Nuclear factor kappa B subunit 2                              | 1.260 | 526.51  | 2.61E-16    | 4.72E-14    |
| 149 | ENSG00000173846 | PLK3     | Polo like kinase 3                                            | 1.256 | 316.99  | 4.10E-14    | 5.13E-12    |
| 150 | ENSG00000175197 | DDIT3    | DNA damage inducible transcript 3                             | 1.255 | 131.33  | 1.78E-10    | 1.08E-08    |
| 151 | ENSG00000153294 | ADGRF4   | Adhesion G protein-coupled receptor F4                        | 1.248 | 78.11   | 1.66E-08    | 6.37E-07    |
| 152 | ENSG00000107984 | DKK1     | Dickkopf WNT signaling pathway inhibitor 1                    | 1.241 | 294.90  | 8.33E-14    | 9.59E-12    |
| 153 | ENSG00000162975 | KCNF1    | Potassium voltage-gated channel modifier subfamily F member 1 | 1.231 | 119.41  | 4.20E-10    | 2.34E-08    |
| 154 | ENSG00000162783 | IER5     | Immediate early response 5                                    | 1.225 | 883.92  | 1.35E-18    | 4.51E-16    |
| 155 | ENSG00000145362 | ANK2     | Ankyrin 2                                                     | 1.212 | 7.79    | 0.010984464 | 0.048135623 |
| 156 | ENSG00000134531 | EMP1     | Epithelial membrane protein 1                                 | 1.205 | 7.85    | 0.010728064 | 0.047234693 |
| 157 | ENSG00000171722 | C1orf111 | Chromosome 1 open reading frame 111                           | 1.204 | 39.33   | 3.27E-06    | 6.28E-05    |

| No. | Ensemble ID     | Gene     | Full gene name                                           | logFC | F      | P value     | FDR         |
|-----|-----------------|----------|----------------------------------------------------------|-------|--------|-------------|-------------|
| 158 | ENSG00000173110 | HSPA6    | Heat shock protein family A (Hsp70) member 6             | 1.203 | 9.28   | 0.006152349 | 0.030679244 |
| 159 | ENSG00000167614 | TYH1     | Tweety family member 1                                   | 1.203 | 10.94  | 0.0033632   | 0.019064483 |
| 160 | ENSG00000171790 | SLFNL1   | Schlafen like 1                                          | 1.203 | 16.39  | 0.00058338  | 0.004666684 |
| 161 | ENSG00000080007 | DDX43    | DEAD-box helicase 43                                     | 1.199 | 124.19 | 2.95E-10    | 1.74E-08    |
| 162 | ENSG00000114757 | PEX5L    | Peroxisomal biogenesis factor 5 like                     | 1.195 | 15.42  | 0.00077945  | 0.005925549 |
| 163 | ENSG00000115641 | FHL2     | Four and a half LIM domains 2                            | 1.185 | 136.38 | 1.26E-10    | 7.97E-09    |
| 164 | ENSG00000187242 | KRT12    | Keratin 12                                               | 1.177 | 17.28  | 0.000450213 | 0.003805248 |
| 165 | ENSG00000173559 | NABP1    | Nucleic acid binding protein 1                           | 1.174 | 116.47 | 5.25E-10    | 2.87E-08    |
| 166 | ENSG00000117525 | F3       | Coagulation factor III                                   | 1.174 | 31.74  | 1.39E-05    | 0.000209378 |
| 167 | ENSG00000221995 | TIAF1    | TGFB1-induced anti-apoptotic factor 1                    | 1.170 | 45.44  | 1.17E-06    | 2.58E-05    |
| 168 | ENSG00000125347 | IRF1     | Interferon regulatory factor 1                           | 1.161 | 137.97 | 1.14E-10    | 7.24E-09    |
| 169 | ENSG00000119714 | GPR68    | G protein-coupled receptor 68                            | 1.157 | 8.68   | 0.007740393 | 0.036596914 |
| 170 | ENSG0000011478  | QPCTL    | Glutamyl-peptide cyclotransferase like                   | 1.154 | 268.72 | 2.06E-13    | 2.13E-11    |
| 171 | ENSG00000165023 | DIRAS2   | DIRAS family GTPase 2                                    | 1.153 | 9.70   | 0.005254426 | 0.027051565 |
| 172 | ENSG00000141458 | NPC1     | NPC intracellular cholesterol transporter 1              | 1.139 | 413.09 | 2.97E-15    | 4.69E-13    |
| 173 | ENSG00000168646 | AXIN2    | Axin 2                                                   | 1.139 | 48.42  | 7.30E-07    | 1.71E-05    |
| 174 | ENSG00000137449 | CPEB2    | Cytoplasmic polyadenylation element binding protein 2    | 1.136 | 171.24 | 1.54E-11    | 1.21E-09    |
| 175 | ENSG00000172183 | SG20     | Interferon stimulated exonuclease gene 20                | 1.128 | 91.39  | 4.40E-09    | 1.92E-07    |
| 176 | ENSG00000153714 | LURAP1L  | Leucine rich adaptor protein 1 like                      | 1.122 | 271.86 | 1.84E-13    | 1.92E-11    |
| 177 | ENSG00000112658 | SRF      | Serum response factor                                    | 1.115 | 628.86 | 4.33E-17    | 8.67E-15    |
| 178 | ENSG00000185291 | IL3RA    | Interleukin 3 receptor subunit alpha                     | 1.113 | 30.85  | 1.66E-05    | 0.00024247  |
| 179 | ENSG00000013441 | CLK1     | CDC like kinase 1                                        | 1.106 | 499.26 | 4.45E-16    | 7.83E-14    |
| 180 | ENSG00000132326 | PER2     | Period circadian clock 2                                 | 1.103 | 324.51 | 3.25E-14    | 4.15E-12    |
| 181 | ENSG00000126500 | FLRT1    | Fibronectin leucine rich transmembrane protein 1         | 1.101 | 18.86  | 0.00028884  | 0.002639926 |
| 182 | ENSG00000175505 | CLCF1    | Cardiotrophin-like cytokine factor 1                     | 1.096 | 142.33 | 8.53E-11    | 5.70E-09    |
| 183 | ENSG00000250423 | KIAA1210 | KIAA1210                                                 | 1.092 | 14.66  | 0.000983147 | 0.007206989 |
| 184 | ENSG00000105856 | HBP1     | HMG-box transcription factor 1                           | 1.073 | 145.98 | 6.76E-11    | 4.63E-09    |
| 185 | ENSG00000135114 | OASL     | 2'-5'-oligoadenylate synthetase like                     | 1.072 | 39.55  | 3.15E-06    | 6.06E-05    |
| 186 | ENSG00000163660 | CCNL1    | Cyclin L1                                                | 1.060 | 751.74 | 7.06E-18    | 1.85E-15    |
| 187 | ENSG00000171431 | KRT20    | Keratin 20                                               | 1.058 | 35.97  | 6.05E-06    | 0.000102761 |
| 188 | ENSG00000167767 | KRT80    | Keratin 80                                               | 1.048 | 781.62 | 4.75E-18    | 1.34E-15    |
| 189 | ENSG00000106546 | AHR      | Aryl hydrocarbon receptor                                | 1.047 | 462.60 | 9.58E-16    | 1.60E-13    |
| 190 | ENSG00000013588 | GPRC5A   | G protein-coupled receptor class C group 5 member A      | 1.045 | 329.49 | 2.80E-14    | 3.64E-12    |
| 191 | ENSG00000138311 | ZNF365   | Zinc finger protein 365                                  | 1.045 | 32.43  | 1.20E-05    | 0.000184939 |
| 192 | ENSG00000186086 | NBPF6    | Neuroblastoma breakpoint family member 6                 | 1.044 | 16.71  | 0.000529922 | 0.004329528 |
| 193 | ENSG00000159713 | TPPP3    | Tubulin polymerization promoting protein family member 3 | 1.040 | 8.71   | 0.007651531 | 0.036238965 |
| 194 | ENSG00000241839 | PLEKH02  | Pleckstrin homology domain containing O2                 | 1.040 | 42.66  | 1.84E-06    | 3.82E-05    |
| 195 | ENSG00000225828 | FAM229A  | Family with sequence similarity 229 member A             | 1.036 | 34.58  | 7.88E-06    | 0.000130124 |
| 196 | ENSG00000053438 | NNAT     | Neuro natin                                              | 1.034 | 21.77  | 0.000133596 | 0.001403354 |
| 197 | ENSG00000135048 | TMEM2    | Transmembrane protein 2                                  | 1.030 | 462.03 | 9.70E-16    | 1.60E-13    |
| 198 | ENSG00000160678 | S100A1   | S100 calcium binding protein A1                          | 1.030 | 50.43  | 5.38E-07    | 1.32E-05    |
| 199 | ENSG00000181016 | LSMEM1   | Leucine rich single-pass membrane protein 1              | 1.028 | 24.42  | 6.96E-05    | 0.000817859 |
| 200 | ENSG00000184697 | CLDN6    | Claudin 6                                                | 1.027 | 9.24   | 0.006237953 | 0.031031027 |

| No. | Ensemble ID     | Gene     | Full gene name                      | logFC | F      | P value     | FDR         |
|-----|-----------------|----------|-------------------------------------|-------|--------|-------------|-------------|
| 201 | ENSG00000100234 | TIMP3    | TIMP metalloproteinase inhibitor 3  | 1.022 | 78.11  | 1.66E-08    | 6.37E-07    |
| 202 | ENSG00000151014 | NOCT     | Nocturnin                           | 1.017 | 263.98 | 2.46E-13    | 2.48E-11    |
| 203 | ENSG00000108821 | COL1A1   | Collagen type I alpha 1 chain       | 1.017 | 110.41 | 8.44E-10    | 4.41E-08    |
| 204 | ENSG00000253958 | CLDN23   | Claudin 23                          | 1.016 | 11.73  | 0.002559698 | 0.015366451 |
| 205 | ENSG00000198517 | MAFK     | MAF bZIP transcription factor K     | 1.012 | 341.77 | 1.95E-14    | 2.59E-12    |
| 206 | ENSG00000111266 | DUSP16   | Dual specificity phosphatase 16     | 1.010 | 521.73 | 2.86E-16    | 5.10E-14    |
| 207 | ENSG00000179133 | C10orf67 | Chromosome 10 open reading frame 67 | 1.006 | 14.37  | 0.001077506 | 0.007773696 |
| 208 | ENSG00000117616 | RSRP1    | Arginine and serine rich protein 1  | 1.002 | 398.66 | 4.24E-15    | 6.41E-13    |

**Supplementary Table S2:** List of significantly downregulated differentially expressed genes obtained from RNA-sequencing of digitonin-injured MCF-7 breast cancer cells at 20-, 40- and 60-min post-injury.

| 20 min timepoint |                 |         |                                                             |         |        |             |             |
|------------------|-----------------|---------|-------------------------------------------------------------|---------|--------|-------------|-------------|
| No.              | Ensemble ID     | Gene    | Full gene name                                              | logFC   | F      | P value     | FDR         |
| 1                | ENSG00000128045 | RASL11B | RAS like family 11 member B                                 | -1.127  | 21.50  | 0.000229448 | 0.021369803 |
| 40 min timepoint |                 |         |                                                             |         |        |             |             |
| No.              | Ensemble ID     | Gene    | Full gene name                                              | logFC   | F      | P value     | FDR         |
| 1                | ENSG00000119938 | PPP1R3C | Protein phosphatase 1 regulatory subunit 3C                 | -1.5182 | 337.94 | 1.82E-13    | 4.54E-11    |
| 2                | ENSG00000132825 | PPP1R3D | Protein phosphatase 1 regulatory subunit 3D                 | -1.0934 | 254.44 | 2.24E-12    | 4.94E-10    |
| 3                | ENSG00000265972 | TXNIP   | Thioredoxin interacting protein [                           | -1.0129 | 212.38 | 1.08E-11    | 2.07E-09    |
| 4                | ENSG00000168209 | DDIT4   | DNA damage inducible transcript 4                           | -1.2451 | 131.51 | 6.33E-10    | 7.54E-08    |
| 5                | ENSG00000115507 | OTX1    | Orthodenticle homeobox 1                                    | -1.0948 | 55.14  | 5.33E-07    | 3.43E-05    |
| 6                | ENSG00000064195 | DLX3    | Distal-less homeobox 3                                      | -1.0895 | 39.81  | 4.93E-06    | 0.000230281 |
| 7                | ENSG00000168269 | FOXI1   | Forkhead box I1                                             | -1.5154 | 39.65  | 5.06E-06    | 0.000234419 |
| 8                | ENSG00000275793 | RIMBP3  | RIMS binding protein 3                                      | -1.6442 | 29.96  | 2.90E-05    | 0.001013628 |
| 9                | ENSG00000166333 | ILK     | Integrin linked kinase                                      | -1.0922 | 15.86  | 0.000813568 | 0.014302941 |
| 10               | ENSG00000182196 | ARL6IP4 | ADP ribosylation factor like GTPase 6 interacting protein 4 | -1.0613 | 13.48  | 0.001644803 | 0.024269132 |
| 11               | ENSG00000164056 | SPRY1   | Sprouty RTK signaling antagonist 1                          | -1.0933 | 12.77  | 0.002056024 | 0.028454443 |
| 12               | ENSG00000182459 | TEX19   | Testis expressed 19                                         | -1.4381 | 11.84  | 0.002773882 | 0.03515929  |
| 60 min timepoint |                 |         |                                                             |         |        |             |             |
| No.              | Ensemble ID     | Gene    | Full gene name                                              | logFC   | F      | P value     | FDR         |
| 1                | ENSG00000265972 | TXNIP   | Thioredoxin interacting protein                             | -1.494  | 394.34 | 4.72E-15    | 7.06E-13    |
| 2                | ENSG00000119938 | PPP1R3C | Protein phosphatase 1 regulatory subunit 3C                 | -1.268  | 218.93 | 1.50E-12    | 1.37E-10    |
| 3                | ENSG00000203883 | SOX18   | SRY-box 18                                                  | -1.473  | 82.78  | 1.02E-08    | 4.16E-07    |
| 4                | ENSG00000064195 | DLX3    | Distal-less homeobox 3                                      | -1.541  | 81.32  | 1.19E-08    | 4.80E-07    |
| 5                | ENSG00000180884 | ZNF792  | Zinc finger protein 792                                     | -1.732  | 70.38  | 3.93E-08    | 1.35E-06    |
| 6                | ENSG00000180739 | S1PR5   | Sphingosine-1-phosphate receptor 5                          | -1.054  | 67.37  | 5.61E-08    | 1.82E-06    |
| 7                | ENSG00000115507 | OTX1    | Orthodenticle homeobox 1                                    | -1.280  | 62.82  | 9.83E-08    | 2.96E-06    |
| 8                | ENSG00000179023 | KLHDC7A | Kelch domain containing 7A                                  | -1.763  | 41.41  | 2.28E-06    | 4.53E-05    |
| 9                | ENSG00000275793 | RIMBP3  | RIMS binding protein 3                                      | -2.174  | 35.81  | 6.23E-06    | 0.000105583 |
| 10               | ENSG00000165655 | ZNF503  | Zinc finger protein 503                                     | -1.027  | 35.72  | 6.34E-06    | 0.000107102 |
| 11               | ENSG00000168269 | FOXI1   | Forkhead box I1                                             | -1.602  | 33.85  | 9.08E-06    | 0.000146315 |
| 12               | ENSG00000187801 | ZFP69B  | ZFP69 zinc finger protein B                                 | -1.158  | 26.32  | 4.46E-05    | 0.000561399 |
| 13               | ENSG00000178150 | ZNF114  | Zinc finger protein 114                                     | -1.027  | 25.88  | 4.93E-05    | 0.000610331 |
| 14               | ENSG00000196544 | BORCS6  | BLOC-1 related complex subunit 6                            | -1.007  | 23.83  | 8.02E-05    | 0.000918341 |
| 15               | ENSG00000158691 | ZSCAN12 | Zinc finger and SCAN domain containing 12                   | -1.049  | 22.47  | 0.000111951 | 0.001216649 |
| 16               | ENSG00000197757 | HOXC6   | Homeobox C6                                                 | -1.224  | 21.24  | 0.000153201 | 0.001565621 |
| 17               | ENSG00000165821 | SALL2   | Spalt like transcription factor 2                           | -1.008  | 16.97  | 0.000491928 | 0.004083319 |
| 18               | ENSG00000187808 | SOWAHD  | Sosondawah ankyrin repeat domain family member D            | -1.316  | 16.80  | 0.000516224 | 0.004246936 |
| 19               | ENSG00000184507 | NUJM1   | NUJ midline carcinoma family member 1                       | -2.121  | 15.52  | 0.0007558   | 0.005779517 |
| 20               | ENSG00000203952 | CCDC160 | Coiled-coil domain containing 160                           | -1.425  | 13.96  | 0.001223006 | 0.008604016 |
| 21               | ENSG00000132481 | TRIM47  | Tripartite motif containing 47                              | -1.147  | 13.40  | 0.001468096 | 0.00989738  |

| No. | Ensemble ID     | Gene    | Full gene name                                   | logFC  | F     | P value     | FDR         |
|-----|-----------------|---------|--------------------------------------------------|--------|-------|-------------|-------------|
| 22  | ENSG00000164056 | SPRY1   | Sprouty RTK signaling antagonist 1               | -1.207 | 11.93 | 0.002389462 | 0.014593661 |
| 23  | ENSG00000234409 | CCDC188 | Coiled-coil domain containing 188                | -1.729 | 11.76 | 0.0025297   | 0.015242611 |
| 24  | ENSG00000173546 | CSPG4   | Chondroitin sulfate proteoglycan 4               | -1.095 | 10.97 | 0.003323236 | 0.018912899 |
| 25  | ENSG00000137843 | PAK6    | p21 (RAC1) activated kinase 6                    | -1.457 | 10.07 | 0.004590236 | 0.024285333 |
| 26  | ENSG00000106006 | HOXA6   | Homeobox A6                                      | -1.384 | 9.81  | 0.005045448 | 0.026193263 |
| 27  | ENSG00000123405 | NFE2    | Nuclear factor erythroid 2                       | -1.101 | 9.69  | 0.005287014 | 0.027165608 |
| 28  | ENSG00000171488 | LRR8C   | Leucine rich repeat containing 8 family member C | -1.044 | 7.77  | 0.011065961 | 0.048394989 |



**Supplementary Table S3: Biological processes (GO terms) significantly associated to the transcriptomic profile post-injury**

Gene ontology analysis was performed using only differentially expressed transcripts were considered. For each associated GO term the total number of genes that are annotated with that specific term is denoted (under “Annotated”), as well as the number of significantly differentially expressed genes in the datasets that are associated with that term (under “Significant”). The “Expected” column refers the number of genes that would be expected to be significantly associated to each term by random chance. Finally, the p-value and FDR from Fisher’s Exact Test reflect the probability of the association of significant transcriptomic changes with that particular GO term.

|                                                               | <i>Häger et al.</i> |             |          |          |          | <i>Rysä et al., 2018</i> |             |          |          |          | <i>Wales et al., 2016</i> |             |          |          |          |
|---------------------------------------------------------------|---------------------|-------------|----------|----------|----------|--------------------------|-------------|----------|----------|----------|---------------------------|-------------|----------|----------|----------|
|                                                               | Annotated           | Significant | Expected | Fisher   | FDR      | Annotated                | Significant | Expected | Fisher   | FDR      | Annotated                 | Significant | Expected | Fisher   | FDR      |
| Cellular response to corticotropin-releasing hormone stimulus | 5                   | 3           | 0.06     | 1.50E-05 | 3.75E-05 | 5                        | 3           | 0.02     | 6.00E-07 | 6.00E-06 | 5                         | 3           | 0.05     | 7.20E-06 | 1.80E-05 |
| Regulation of type B pancreatic cell proliferation            | 10                  | 3           | 0.12     | 1.80E-04 | 2.84E-04 | 10                       | 3           | 0.04     | 7.10E-06 | 3.04E-05 | 10                        | 3           | 0.09     | 8.30E-05 | 1.31E-04 |
| Positive regulation of smooth muscle cell proliferation       | 72                  | 6           | 0.84     | 1.90E-04 | 2.85E-04 | 72                       | 5           | 0.29     | 9.80E-06 | 3.67E-05 | 37                        | 4           | 0.33     | 3.40E-04 | 3.40E-04 |
| Fat cell differentiation                                      | 205                 | 14          | 2.38     | 1.20E-07 | 7.20E-07 | 203                      | 8           | 0.81     | 1.40E-06 | 8.40E-06 | 203                       | 12          | 1.84     | 3.20E-07 | 1.60E-06 |
| Response to cAMP                                              | 95                  | 10          | 1.11     | 1.50E-07 | 7.50E-07 | 95                       | 4           | 0.38     | 5.60E-04 | 6.00E-04 | 95                        | 9           | 0.86     | 1.90E-07 | 1.14E-06 |
| Negative regulation of ERK1 and ERK2 cascade                  | 55                  | 8           | 0.64     | 2.20E-07 | 8.25E-07 |                          |             |          |          |          | 55                        | 7           | 0.05     | 6.00E-07 | 2.57E-06 |
| Response to hydrogen peroxide                                 | 126                 | 10          | 1.47     | 2.10E-06 | 7.00E-06 |                          |             |          |          |          | 126                       | 13          | 1.14     | 1.10E-10 | 3.30E-09 |
| Inactivation of MAPK activity                                 | 26                  | 5           | 0.03     | 1.10E-05 | 3.00E-05 |                          |             |          |          |          | 26                        | 5           | 0.24     | 3.20E-06 | 1.07E-05 |
| Skin morphogenesis                                            | 9                   | 3           | 0.01     | 1.20E-04 | 2.12E-04 |                          |             |          |          |          | 9                         | 3           | 0.08     | 5.80E-05 | 1.02E-04 |
| Inflammatory response                                         | 642                 | 21          | 7.47     | 1.90E-05 | 4.38E+09 |                          |             |          |          |          | 646                       | 17          | 5.84     | 7.60E-05 | 1.27E-04 |
| Cellular response to calcium ion                              | 51                  | 5           | 0.59     | 3.10E-04 | 4.04E-04 |                          |             |          |          |          | 51                        | 5           | 0.46     | 9.50E-05 | 1.43E-04 |
| Circadian regulation of gene expression                       | 54                  | 6           | 0.63     | 3.70E-05 | 7.93E-05 |                          |             |          |          |          | 54                        | 5           | 0.49     | 1.30E-04 | 1.63E-04 |
| Cellular response to cycloheximide                            | 3                   | 2           | 0.03     | 4.00E-04 | 4.10E-04 |                          |             |          |          |          | 3                         | 2           | 0.03     | 2.40E-04 | 2.57E-04 |
